# Supplementary material for: Familiarizing Students with Definition of Lebesgue Outer Measure Using Mathematica: Some Examples of Calculation Directly from Its Definition
Source: Springer Nature journal article supplement (doi:10.1007/s11786-019-00435-2), 2019-12-18
Supplement: MOESM1 [file 17517282]

*SUPPLEMENTARY MATERIALS: FAMILIARIZING STUDENTS WITH  
DEFINITION OF LEBESGUE OUTER MEASURE USING MATHEMATICA -  
SOME EXAMPLES OF CALCULATION DIRECTLY FROM ITS DEFINITION*

WŁODZIMIERZ WOJAS, JAN KRUPA, AND JAROSŁAW BOJARSKI

The following Figures 1, 2, 3 and 4 are dynamic versions of the Figures 1, 2, 3 and 4 in the article: **Familiarizing students with definition of Lebesgue outer measure using Mathematica - some examples of calculation directly from its definition**. We would like to stress the fact that the controls at the bottom of the Figures 1, 2, 3 and 4 work.

FIGURE 1. Approximation of Lebesgue outer measure of  $A = \{(x, y) \in \mathbb{R}^2 : 0 \leq y \leq x^2, 0 \leq x \leq 1\}$  by rectangles  $\bigcup_{j=1}^n R_j^n$ ,  $n \in \{20, 2, 4, 6, 10, 40, 100\}$  for **Example 1**. The controls at the bottom of the Figure work.

FIGURE 2. Approximation of Lebesgue outer measure of  $A = \{(x, y) \in \mathbb{R}^2 : 0 \leq y \leq x^2, 0 \leq x \leq 1\}$  by rectangles  $\bigcup_{j=1}^n \bar{R}_j^n$ ,  $n \in \{20, 2, 4, 6, 10, 40, 100\}$  for **Example 1**. The controls at the bottom of the Figure work.

FIGURE 3. Approximation of Lebesgue outer measure of  $A = \{(x, y) \in \mathbb{R}^2 : 0 \leq y \leq \exp(-x), x \geq 0\}$  by rectangles  $\bigcup_{j=0}^{n2^n-1} R_j^n$ ,  $n \in \{3, 1, 2, 4, 5\}$  for **Example 2**. The controls at the bottom of the Figure work.

FIGURE 4. Approximation of Lebesgue outer measure of  $A = \{(x, y) \in \mathbb{R}^2 : 0 \leq y \leq \exp(-x), x \geq 0\}$  by rectangles  $\bigcup_{j=0}^{2^n-1} \bigcup_{k=0}^{\infty} \tilde{R}_{jk}^n$ ,  $n \in \{3, 1, 2, 3, 4, 8\}$  for **Example 2**. The controls at the bottom of the Figure work.

WARSAW UNIVERSITY OF LIFE SCIENCES (SGGW), UL. NOWOURSZYŃSKA 159, DEPARTMENT OF APPLIED MATHEMATICS, 02-776 WARSAW, POLAND

*Email address:* wlozdzimierz.wojas@sggw.pl

WARSAW UNIVERSITY OF LIFE SCIENCES (SGGW), DEPARTMENT OF APPLIED MATHEMATICS, UL. NOWOURSZYŃSKA 159, 02-776 WARSAW, POLAND

*Email address:* jan.krupa@sggw.pl

WARSAW UNIVERSITY OF LIFE SCIENCES (SGGW), DEPARTMENT OF APPLIED MATHEMATICS, UL. NOWOURSZYŃSKA 159, 02-776 WARSAW, POLAND

*Email address:* jaroslaw.bojarski@sggw.pl
